# Supplementary material
Source: Springer Nature journal article supplement (https://www.springermedizin.de/resource/supplementary/12874_2011_823_MOESM1_ESM.pdf/9432684)
Supplement: MOESM1 [file 9432684]

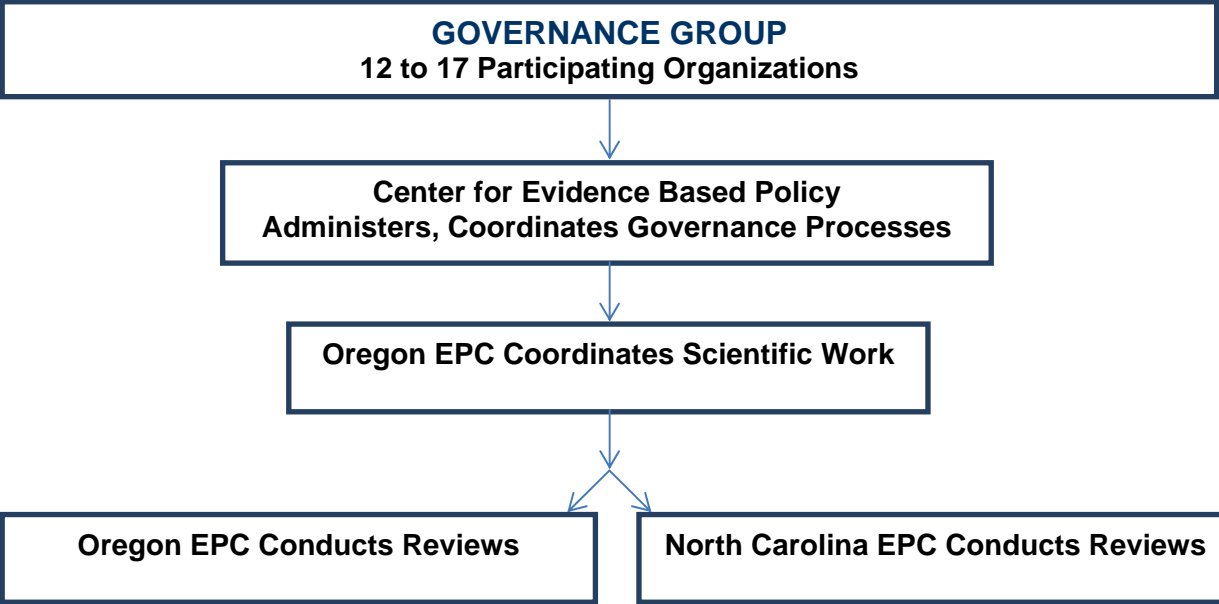

| DERP Governance Group Composition |  |                |               |
|-----------------------------------|--|----------------|---------------|
| DERP I (15)                       |  | DERP II (17)   | DERP III (12) |
| Alaska                            |  | Alaska         | Arkansas      |
| Arkansas                          |  | Arkansas       | CADTH*        |
| CADTH*                            |  | California     | Colorado      |
| California HCF                    |  | California HCF | Idaho         |
| Idaho                             |  | CADTH*         | Maryland      |
| Kansas                            |  | Idaho          | Missouri      |
| Michigan                          |  | Kansas         | Montana       |
| Minnesota                         |  | Michigan       | New York      |
| Missouri                          |  | Minnesota      | Oregon        |
| Montana                           |  | Missouri       | Washington    |
| North Carolina                    |  | Montana        | Wisconsin     |
| Oregon                            |  | New York       | Wyoming       |
| Washington                        |  | North Carolina |               |
| Wisconsin                         |  | Oregon         |               |
| Wyoming                           |  | Washington     |               |
|                                   |  | Wisconsin      |               |
|                                   |  | Wyoming        |               |
